# Supplementary material for: Activation of the IL-17/TRAF6/NF-κB pathway is implicated in Aβ-induced neurotoxicity
Source: PubMed Central journal article supplement (PMC9951515; doi:10.1186/s12868-023-00782-8), 2023-02-23

**Figure 1B**

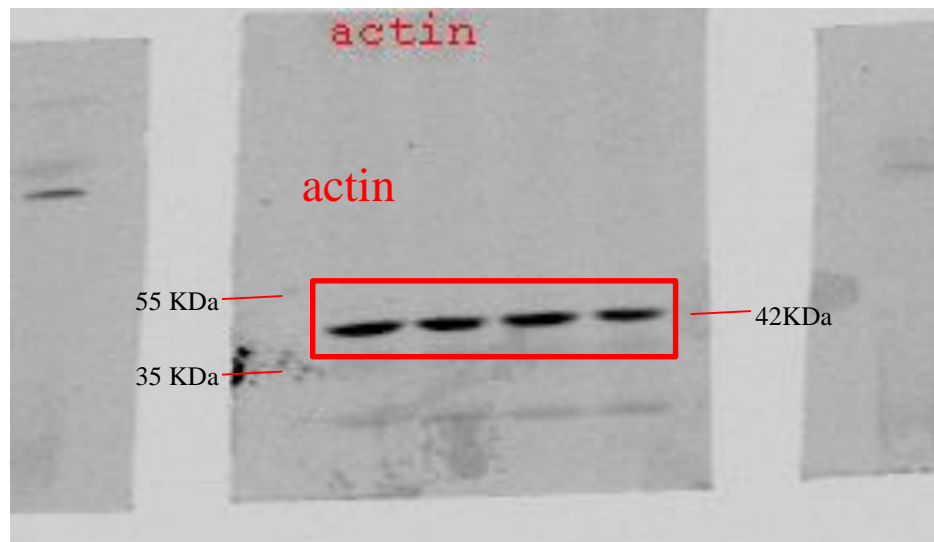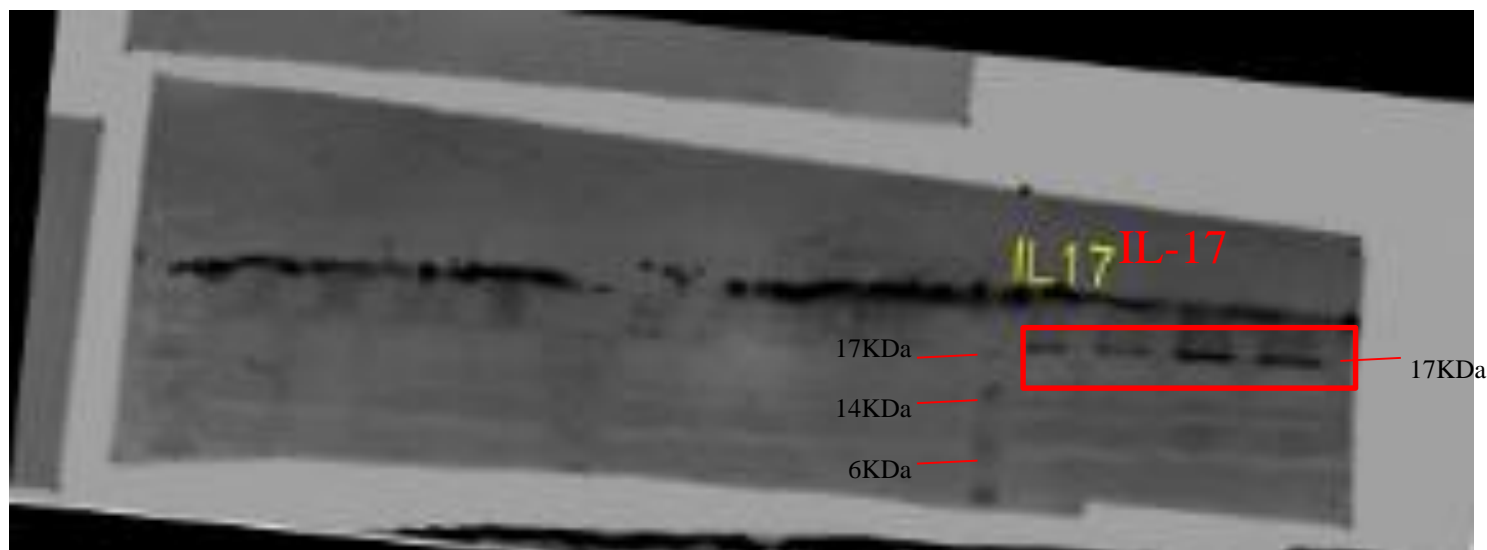

**Figure 3B**

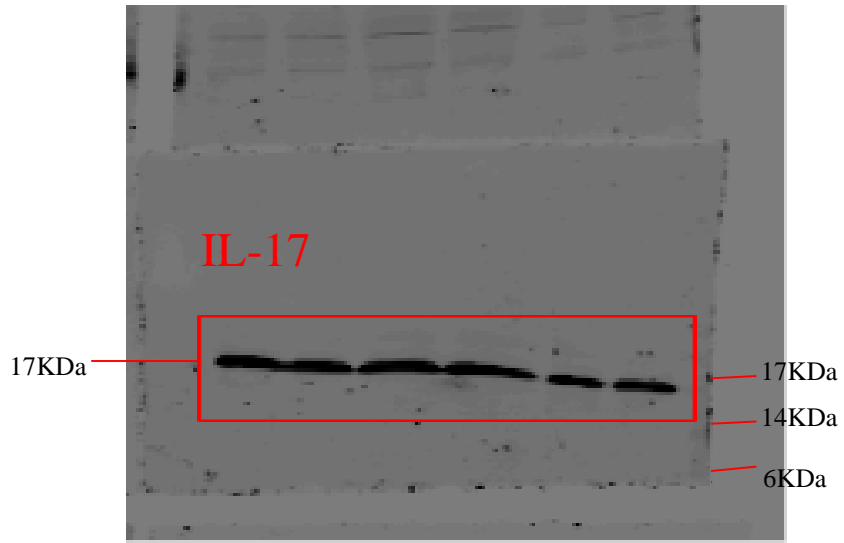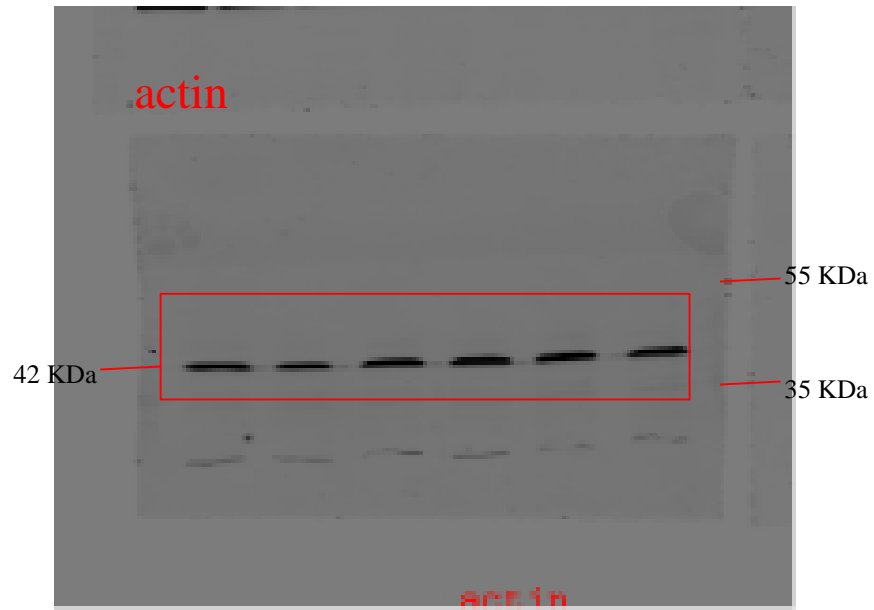

**Figure 4G**

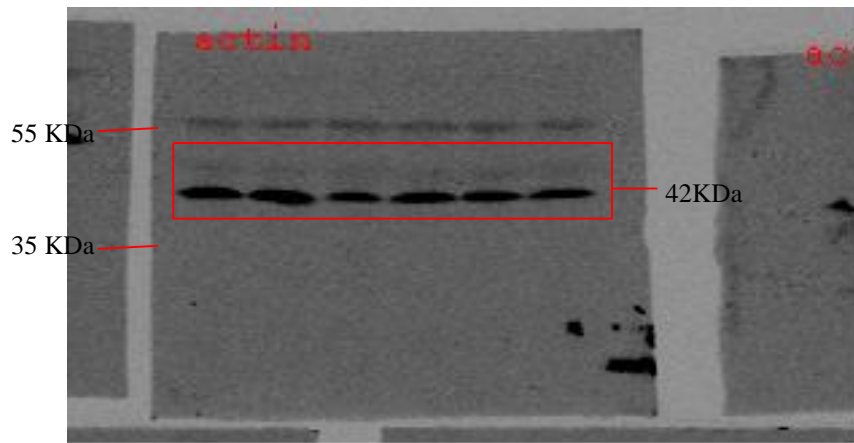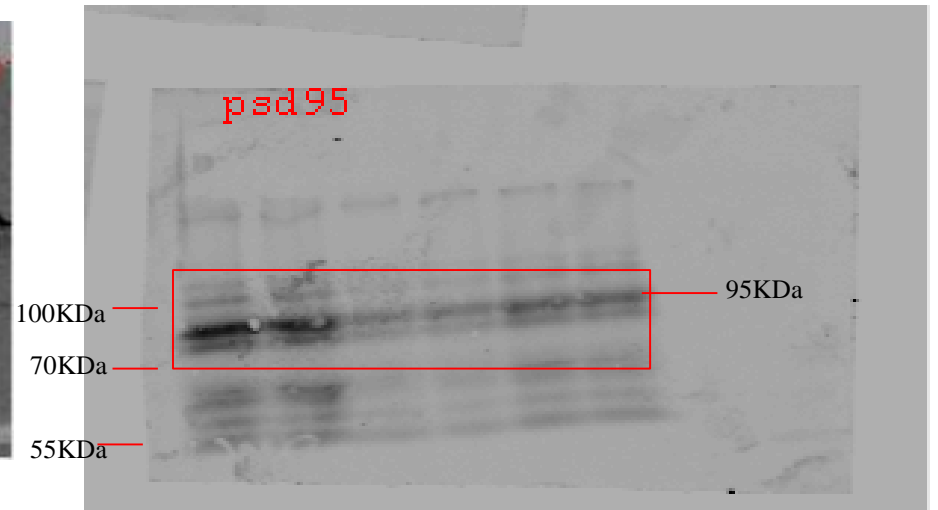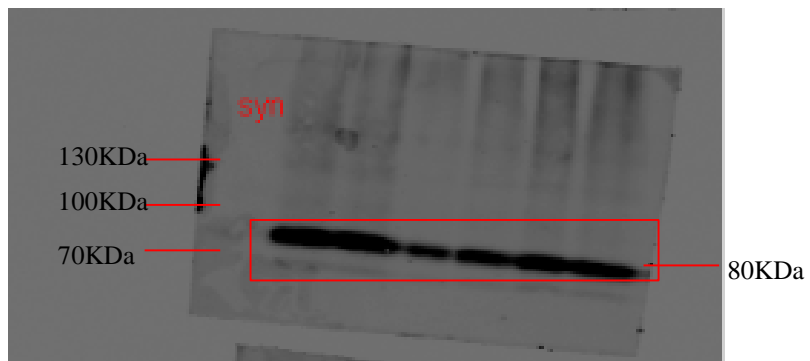

**Figure 5**

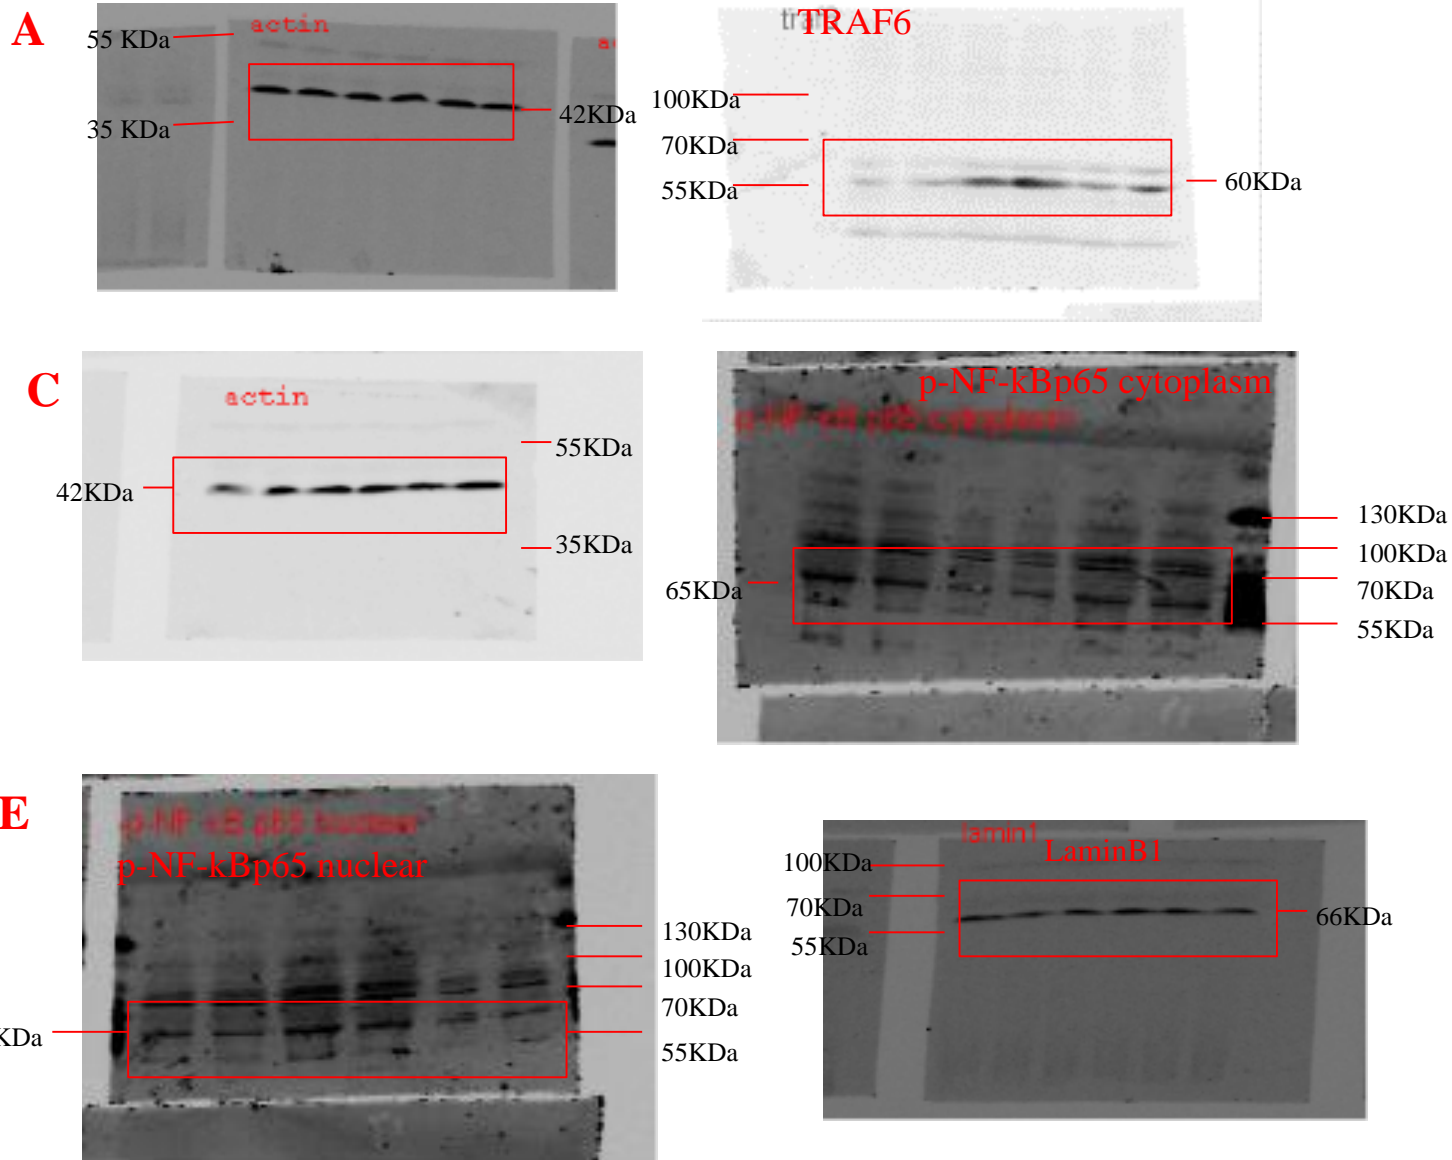

Supplement: 12868_2023_782_MOESM1_ESM.pdf [file 12868_2023_782_MOESM1_ESM.pdf]
